# Supplementary material for: Underground Reservoirs Regulate the Composition and Metabolism of Microbial Community in Coal Mine Water
Source: PubMed Central journal article supplement — ACS Omega. 2024 Dec 13;9(51):50786–95. doi: 10.1021/acsomega.4c09348 (PMC11683604; doi:10.1021/acsomega.4c09348), 2024-12-13
Supplement: ao4c09348_si_001.pdf [file ao4c09348_si_001.pdf]

Supporting information for

**Underground Reservoirs Regulate the Composition and Metabolism of  
Microbial Community in Coal Mine Water**

Yang Li<sup>ac\*</sup> §, Min Wu<sup>a§</sup>, Haiqin Zhang<sup>a</sup>, Binbin Jiang<sup>a</sup>, Yixiang Bao<sup>a</sup>, Jie Li<sup>ab</sup>, Jingfeng Li<sup>a</sup>,  
Peng Li<sup>b</sup>, Xinyue Yan<sup>c</sup>, Tianqi Qin<sup>c</sup>

<sup>a</sup> *State Key Laboratory of Water Resource Protection and Utilization in Coal Mining, National Institute of Low Carbon and Clean Energy, CHN Energy, Beijing 102211, China*

<sup>b</sup> *Technology Research Institute, Shendong Coal Group Co., Ltd., CHN Energy, Yulin 719315, China*

<sup>c</sup> *State Key Laboratory of Mining Response and Disaster Prevention and Control in Deep Coal Mines, Anhui University of Science and Technology, Huainan 232001, China*

\* Email: liyang20130104@163.com; [liyang\\_aust@163.com](mailto:liyang_aust@163.com)

§ Y.L. and M.W. contributed equally to this work.

Total pages: 13

Tables: 2

Figures: 8

## Supporting Tables

**Table S1 Sampling at various coal mines**

| Coal mine name and GPS coordinates                            | Sample number | Taken position |
|---------------------------------------------------------------|---------------|----------------|
| Shangwan Coal Mine<br>(E 110.18°-110.20°, N 39.28°-39.30°)    | 616A3         | influent       |
|                                                               | 616A4         | effluent       |
|                                                               | 616A5         | effluent       |
| Cuncaota Coal Mine II<br>(E 109.59°-110.03°, N 39.27°-39.30°) | 576A13        | influent       |
|                                                               | 576A3         | effluent       |
| Cuncaota Coal Mine I<br>(E 110.15°-110.17°, N 39.22°- 39.25°) | 576A10        | influent       |
|                                                               | 616A1         | effluent       |
| Buertai Coal Mine<br>(E 109.87°-110.08°, N 39.43°-39.53°)     | 576A5         | influent       |
|                                                               | 576A1         | effluent       |
| Wulanmulun Coal Mine<br>(E 100.03°-110.18°, N 39.42°-39.55°)  | 576A6         | influent       |
|                                                               | 576A7         | influent       |
|                                                               | 576A2         | effluent       |
| Liuta Coal Mine<br>(E 110.06°-110.12°, N 39.35°-39.40°)       | 675A3         | influent       |
|                                                               | 675A4         | influent       |
|                                                               | 675A5         | effluent       |
| Daluita Coal Mine<br>(E 110.33°-110.38°, N 39.23°-39.28°)     | 422A2         | influent       |
|                                                               | 422A1         | effluent       |
| Bulianta Coal Mine<br>(E 109.93°-110.17°, N 39.25°-39.40°)    | 576A4         | influent       |
|                                                               | 616A2         | effluent       |
| Shigetai Coal Mine<br>(E 109.20°-110.22°, N 36.27°-39.28°)    | 528j          | influent       |
|                                                               | 528           | effluent       |
| Haragou Coal Mine<br>(E 110.09°-110.18°, N 39.17°-39.35°)     | 576A16        | influent       |
|                                                               | 675A1         | effluent       |

**Table S2 The compounds in mine water visibly increase and decrease after passing through underground water reservoirs.**

|           | FC       | log2(FC) | raw.pval  | Chemical Compound                             | Molecular Formula  |
|-----------|----------|----------|-----------|-----------------------------------------------|--------------------|
| HMDB30931 | 2.9882   | 1.5793   | 0.0014133 | (E)-2-Tridecene-4,6,8-triyn-1-ol              | C13 H14 O          |
| HMDB38701 | 8.756    | 3.1303   | 0.001425  | Peltatol A                                    | C42 H58 O4         |
| HMDB14449 | 2.7599   | 1.4646   | 0.0015787 | Desogestrel                                   | C22 H30 O          |
| HMDB14619 | 2.7417   | 1.455    | 0.0024898 | Duloxetine                                    | C18 H19 N O S      |
| HMDB11280 | 0.27823  | -1.8456  | 0.0025146 | PC(P-18:1(11Z)/18:4(6Z,9Z,12Z,15Z))           | C44 H79 N O7 P     |
| HMDB14653 | 0.18147  | -2.4622  | 0.0027981 | Vancomycin                                    | C66 H75 Cl2 N9 O24 |
| HMDB12148 | 2.8479   | 1.5099   | 0.0029133 | 2-Hexaprenyl-6-methoxy-1,4-benzoquinol        | C37 H56 O3         |
| HMDB10666 | 6.2148   | 2.6357   | 0.0031878 | PG(18:3(6Z,9Z,12Z)/18:3(6Z,9Z,12Z))           | C42 H71 O10 P      |
| HMDB35551 | 0.31741  | -1.6556  | 0.0031979 | 7,9-Hexacosanedione                           | C26 H50 O2         |
| HMDB38026 | 2.999    | 1.5845   | 0.0043707 | Dihydro-alpha-ionone                          | C13 H22 O          |
| HMDB00089 | 0.16003  | -2.6436  | 0.0048653 | Cytidine                                      | C9 H13 N3 O5       |
| HMDB29117 | 2.7369   | 1.4525   | 0.0049164 | Tyrosyl-Tyrosine                              | C18 H20 N2 O5      |
| HMDB14592 | 0.40511  | -1.3036  | 0.0054244 | Dipivefrin                                    | C19 H29 N O5       |
| HMDB08825 | 0.011506 | -6.4415  | 0.006057  | PE(14:0/16:1(9Z))                             | C35 H68 N O8 P     |
| HMDB09363 | 5.956    | 2.5743   | 0.0061898 | PE(20:3(8Z,11Z,14Z)/20:2(11Z,14Z))            | C45 H80 N O8 P     |
| HMDB36320 | 7.7593   | 2.9559   | 0.00626   | (S)-Skyrin 2-glucoside                        | C36 H28 O15        |
| HMDB07866 | 14.347   | 3.8426   | 0.0067906 | PC(14:0/14:0)                                 | C36 H73 N O8 P     |
| HMDB08297 | 7.8848   | 2.9791   | 0.0079781 | PC(20:1(11Z)/15:0)                            | C43 H85 N O8 P     |
| HMDB40792 | 0.20758  | -2.2683  | 0.0083219 | Dihydroxyacidissiminol                        | C25 H33 N O5       |
| HMDB38011 | 5.356    | 2.4212   | 0.0084916 | Malvidin 3-(6-coumaroylglucoside) 5-glucoside | C38 H41 O19        |

|           |         |         |           |                                                                                                       |                  |
|-----------|---------|---------|-----------|-------------------------------------------------------------------------------------------------------|------------------|
| HMDB38922 | 0.12873 | -2.9576 | 0.0092665 | (7'R)-(+)-Lyoniresinol 9'-glucoside<br>(3x,5x,10x)-9,10-Didehydroisohumbertiol                        | C28 H38 O13      |
| HMDB40688 | 3.991   | 1.9968  | 0.009823  | O-[rhamnopyranosyl-(1->4)-rhamnopyranosyl-(1->2<br>)-[(E)-feruloyl-(->4)-rhamnosyl-(1->6)]-glucoside] | C49 H70 O21      |
| HMDB10380 | 3.2086  | 1.6819  | 0.0098863 | LysoPC(14:1(9Z))                                                                                      | C22 H45 N O7 P   |
| HMDB15026 | 3.5977  | 1.8471  | 0.0099966 | Granisetron                                                                                           | C18 H24 N4 O     |
| HMDB09606 | 5.3274  | 2.4134  | 0.010284  | PE(22:4(7Z,10Z,13Z,16Z)/24:0)                                                                         | C51 H94 N O8 P   |
| HMDB29949 | 0.22952 | -2.1233 | 0.010525  | Pangamic acid                                                                                         | C20 H40 N2 O8    |
| HMDB35565 | 0.26584 | -1.9114 | 0.010849  | 4,6-Tricosanedione                                                                                    | C23 H44 O2       |
| HMDB41911 | 2.8564  | 1.5142  | 0.012606  | isepamicin                                                                                            | C22 H43 N5 O12   |
| HMDB59699 | 4.7874  | 2.2592  | 0.013445  | Procerin                                                                                              | C15 H18 O2       |
| HMDB40697 | 0.31264 | -1.6774 | 0.013496  | Oblongine                                                                                             | C19 H24 N O3     |
| HMDB33356 | 0.32193 | -1.6352 | 0.014135  | Xanthoplanine                                                                                         | C21 H26 N O4     |
| HMDB10343 | 3.3278  | 1.7346  | 0.014657  | 1-(alpha-Methyl-4-(2-methylpropyl)benzeneacetate<br>)-beta-D-Glucopyranuronic acid                    | C19 H26 O8       |
| HMDB39962 | 3.6213  | 1.8565  | 0.014992  | N1,N5,N10-Tris-trans-p-coumaroylspermine                                                              | C37 H44 N4 O6    |
| HMDB39432 | 0.22379 | -2.1598 | 0.016117  | 1,2,4,5,7,8-Hexathionane                                                                              | C3 H6 S6         |
| HMDB36298 | 3.2279  | 1.6906  | 0.016374  | Cyclopassifloic acid E                                                                                | C31 H52 O8       |
| HMDB01898 | 3.4384  | 1.7817  | 0.016644  | Mesobilirubinogen                                                                                     | C33 H44 N4 O6    |
| HMDB07784 | 2.7193  | 1.4433  | 0.016652  | DG(22:6(4Z,7Z,10Z,13Z,16Z,19Z)/22:2(13Z,16Z)/0:0)                                                     | C47 H76 O5       |
| HMDB41052 | 2.7213  | 1.4443  | 0.016711  | Ajocysteine                                                                                           | C9 H15 N O3 S3   |
| HMDB12006 | 2.6712  | 1.4175  | 0.016814  | Ganglioside GT1c (d18:0/26:1(17Z))                                                                    | C104 H182 N4 O47 |
| HMDB39804 | 2.6444  | 1.4029  | 0.016838  | 3-Hexylpyridine                                                                                       | C11 H17 N        |

|           |         |         |          |                                   |                 |
|-----------|---------|---------|----------|-----------------------------------|-----------------|
| HMDB38452 | 3.0382  | 1.6032  | 0.017165 | 28-Glucosylpomolate               | C36 H58 O9      |
| HMDB32293 | 0.35274 | -1.5033 | 0.017202 | N-Gluconyl ethanolamine           | C8 H17 N O7     |
| HMDB12078 | 2.7941  | 1.4824  | 0.017572 | Ganglioside GT3 (d18:1/24:1(15Z)) | C87 H152 N4 O37 |
| HMDB29154 | 14.938  | 3.9009  | 0.017886 | Gamma-glutamyl-Lysine             | C11 H22 N4 O4   |
| HMDB12033 | 2.9752  | 1.573   | 0.017917 | Ganglioside GT2 (d18:0/24:1(15Z)) | C96 H168 N4 O42 |
| HMDB01969 | 2.8935  | 1.5328  | 0.017991 | Dolichol                          | C100 H164 O     |
| HMDB28712 | 4.5475  | 2.1851  | 0.018419 | Arginyl-Isoleucine                | C12 H25 N5 O3   |
| HMDB33625 | 3.1273  | 1.6449  | 0.018593 | (3R,7R)-1,3,7-Octanetriol         | C8 H18 O3       |
| HMDB33799 | 3.0599  | 1.6135  | 0.018951 | 26-Desglucoavenacoside A          | C45 H72 O18     |
| HMDB39636 | 2.8953  | 1.5337  | 0.019053 | Abscisic alcohol 11-glucoside     | C21 H32 O8      |
| HMDB32800 | 2.3699  | 1.2448  | 0.019797 | Feruloylcholine                   | C15 H22 N O4    |
| HMDB32719 | 5.0643  | 2.3403  | 0.020252 | Isofumonisin B1                   | C34 H59 N O15   |
| HMDB11528 | 2.8917  | 1.5319  | 0.020444 | LysoPE(24:1(15Z)/0:0)             | C29 H58 N O7 P  |
| HMDB29083 | 3.3387  | 1.7393  | 0.020513 | Tryptophyl-Glycine                | C13 H15 N3 O3   |
| HMDB15147 | 4.7263  | 2.2407  | 0.021139 | Cinacalcet                        | C22 H22 F3 N    |
| HMDB31716 | 3.2312  | 1.6921  | 0.021231 | 3-(Methylthio)-1-propanol         | C4 H10 O S      |
| HMDB40188 | 0.19692 | -2.3443 | 0.022982 | 1,1-Dibromo-2-propanone           | C3 H4 Br2 O     |
| HMDB38244 | 0.3213  | -1.638  | 0.0234   | Panaxatriol                       | C30 H52 O4      |
| HMDB32315 | 2.3262  | 1.218   | 0.023752 | Hexanal butane-2,3-diol acetal    | C10 H20 O2      |
| HMDB38286 | 0.3376  | -1.5666 | 0.023857 | Eujambin                          | C30 H26 O17     |
| HMDB01345 | 2.0775  | 1.0548  | 0.023963 | 4-Trimethylammoniobutanal         | C7 H16 N O      |
| HMDB28818 | 2.2279  | 1.1557  | 0.023982 | Glutamyl-glutamate                | C10 H15 N2 O7   |

|           |          |         |          |                                                                          |                   |
|-----------|----------|---------|----------|--------------------------------------------------------------------------|-------------------|
| HMDB29356 | 3.2853   | 1.716   | 0.024161 | N-Feruloylglycyl-L-phenylalanine                                         | C21 H22 N2 O6     |
| HMDB39728 | 2.2112   | 1.1448  | 0.024783 | b-D-Glucuronopyranosyl-(1->3)-a-D-galacturonopyranosyl-(1->2)-L-rhamnose | C18 H28 O17       |
| HMDB06288 | 0.35275  | -1.5033 | 0.02525  | All trans decaprenyl diphosphate                                         | C50 H90 O7 P2     |
| HMDB04898 | 0.42625  | -1.2302 | 0.025514 | Ganglioside GA2 (d18:1/25:0)                                             | C63 H118 N2 O18   |
| HMDB00636 | 2.1613   | 1.1119  | 0.026338 | Dioleoylphosphatidic acid                                                | C39 H73 O8 P      |
| HMDB28732 | 0.39087  | -1.3552 | 0.026422 | Asparaginy-Hydroxyproline                                                | C9 H15 N3 O5      |
| HMDB40672 | 0.13169  | -2.9248 | 0.026426 | 3-Oxo-alpha-ionol 9-[apiosyl-(1->6)-glucoside]                           | C24 H38 O11       |
| HMDB29973 | 0.37098  | -1.4306 | 0.026612 | Simonin I                                                                | C69 H112 O21      |
| HMDB39695 | 0.22661  | -2.1417 | 0.027006 | 4,7-Didehydroneophysalin B                                               | C28 H28 O9        |
| HMDB15416 | 3.6751   | 1.8778  | 0.027039 | Fosamprenavir                                                            | C25 H36 N3 O9 P S |
| HMDB09791 | 0.2448   | -2.0303 | 0.027092 | PI(16:0/22:2(13Z,16Z))                                                   | C47 H87 O13 P     |
| HMDB29237 | 2.882    | 1.527   | 0.027199 | Cyanidin 3-(6''-succinyl-glucoside)                                      | C25 H25 O14       |
| HMDB12357 | 2.4244   | 1.2776  | 0.027459 | PS(16:0/18:1(9Z))                                                        | C40 H76 N O10 P   |
| HMDB28990 | 5.781    | 2.5313  | 0.027536 | Phenylalanyl-Asparagine                                                  | C13 H17 N3 O4     |
| HMDB35996 | 2.3861   | 1.2546  | 0.027606 | 2-(Methylthio)-3H-phenoxazin-3-one                                       | C13 H9 N O2 S     |
| HMDB41632 | 2.4398   | 1.2867  | 0.027996 | 5alpha-Cholestane                                                        | C27 H48           |
| HMDB09597 | 5.085    | 2.3463  | 0.028108 | PE(22:4(7Z,10Z,13Z,16Z)/20:4(8Z,11Z,14Z,17Z))                            | C47 H78 N O8 P    |
| HMDB37420 | 0.27124  | -1.8824 | 0.028333 | Maysin 3'-methyl ether                                                   | C28 H30 O14       |
| HMDB40133 | 0.30613  | -1.7078 | 0.028849 | Pectenotoxin 2 secoacid                                                  | C47 H72 O15       |
| HMDB41826 | 0.3015   | -1.7298 | 0.029734 | amifloxacin                                                              | C16 H19 F N4 O3   |
| HMDB09195 | 0.078383 | -3.6733 | 0.030129 | PE(18:4(6Z,9Z,12Z,15Z)/18:4(6Z,9Z,12Z,15Z))                              | C41 H66 N O8 P    |

|           |          |         |          |                                                                   |                   |
|-----------|----------|---------|----------|-------------------------------------------------------------------|-------------------|
| HMDB07910 | 3.3535   | 1.7457  | 0.030397 | PC(14:1(9Z)/18:4(6Z,9Z,12Z,15Z))                                  | C40 H71 N O8 P    |
| HMDB02706 | 2.0532   | 1.0379  | 0.030979 | L-Canavanine                                                      | C5 H12 N4 O3      |
| HMDB15277 | 0.068429 | -3.8693 | 0.032194 | Diphenylpyraline                                                  | C19 H23 N O       |
| HMDB34248 | 2.7082   | 1.4373  | 0.032646 | Pyropheophytin b                                                  | C53 H70 N4 O4     |
| HMDB00777 | 0.35153  | -1.5083 | 0.032863 | N-Acrylylglycine methyl ester                                     | C6 H9 N O3        |
| HMDB35732 | 2.4315   | 1.2819  | 0.033145 | Dukunolide D                                                      | C26 H28 O8        |
| HMDB07955 | 5.7588   | 2.5258  | 0.033482 | PC(15:0/22:4(7Z,10Z,13Z,16Z))                                     | C45 H83 N O8 P    |
| HMDB06970 | 4.4872   | 2.1658  | 0.033896 | CDP-DG(16:0/18:1(11Z))                                            | C46 H83 N3 O15 P2 |
| HMDB35459 | 2.4715   | 1.3054  | 0.034192 | YGM 1A                                                            | C49 H51 O26       |
| HMDB33336 | 2.007    | 1.005   | 0.034894 | Antibiotic X 14889A                                               | C33 H60 O8        |
| HMDB33887 | 0.35092  | -1.5108 | 0.035371 | Chondrillasterol<br>3-[glucosyl-(1->2)-glucosyl-(1->2)-glucoside] | C47 H78 O16       |
| HMDB00827 | 0.10149  | -3.3006 | 0.035876 | Stearic acid                                                      | C18 H36 O2        |
| HMDB28912 | 3.4023   | 1.7665  | 0.036687 | Isoleucyl-Lysine                                                  | C12 H25 N3 O3     |
| HMDB02139 | 2.7113   | 1.439   | 0.036726 | Ubisemiquinone                                                    | C59 H90 O4        |
| HMDB37158 | 0.34576  | -1.5322 | 0.036802 | 3-[(2-Methyl-3-furanyl)thio]-4-heptanone                          | C12 H18 O2 S      |
| HMDB29045 | 0.27824  | -1.8456 | 0.037546 | Seriny-Methionine                                                 | C8 H16 N2 O4 S    |
| HMDB00798 | 2.1844   | 1.1272  | 0.037625 | Ethyl heptanoate                                                  | C9 H18 O2         |
| HMDB09457 | 2.7032   | 1.4346  | 0.037921 | PE(20:5(5Z,8Z,11Z,14Z,17Z)/18:3(6Z,9Z,12Z))                       | C43 H70 N O8 P    |
| HMDB14931 | 2.2887   | 1.1945  | 0.037998 | Haloprogin                                                        | C9 H4 Cl3 I O     |
| HMDB32023 | 0.1802   | -2.4724 | 0.038854 | 3-Epidemissidine                                                  | C27 H45 N O       |
| HMDB31252 | 9.4825   | 3.2453  | 0.039652 | 3-Iodopropanoic acid                                              | C3 H5 I O2        |

|           |               |         |          |                                                                                        |                 |
|-----------|---------------|---------|----------|----------------------------------------------------------------------------------------|-----------------|
| HMDB10379 | 3.3395        | 1.7396  | 0.040616 | LysoPC(14:0)                                                                           | C22 H47 N O7 P  |
| HMDB41519 | 2.9131        | 1.5426  | 0.041032 | Nb-Feruloyltryptamine                                                                  | C20 H20 N2 O3   |
| HMDB40059 | 2.3564        | 1.2366  | 0.041112 | (±)-2-(2-Furanyl)pyrrolidine                                                           | C8 H11 N O      |
| HMDB15608 | 0.096162      | -3.3784 | 0.041722 | Indacaterol                                                                            | C24 H28 N2 O3   |
| HMDB41723 | 0.46042       | -1.119  | 0.042158 | Dihydroferulic acid 4-O-glucuronide                                                    | C16 H20 O10     |
| HMDB39138 | 0.003543<br>7 | -8.1405 | 0.042199 | Hericenone C                                                                           | C35 H54 O6      |
| HMDB02818 | 5.2757        | 2.3994  | 0.042817 | Alloxan                                                                                | C4 H2 N2 O4     |
| HMDB30833 | 2.3411        | 1.2272  | 0.043222 | Bilobetin                                                                              | C31 H20 O10     |
| HMDB10551 | 7.5262        | 2.9119  | 0.043482 | TG(22:5(7Z,10Z,13Z,16Z,19Z)/20:4(5Z,8Z,11Z,14Z)/2<br>2:6(4Z,7Z,10Z,13Z,16Z,19Z))[iso6] | C67 H100 O6     |
| HMDB34557 | 0.29688       | -1.752  | 0.043807 | 8,8-Diethoxy-2,6-dimethyl-2-octanol                                                    | C14 H30 O3      |
| HMDB32419 | 3.9466        | 1.9806  | 0.043817 | 2-(4-Methyl-5-thiazolyl)ethyl decanoate                                                | C16 H27 N O2 S  |
| HMDB41129 | 2.6853        | 1.4251  | 0.043959 | 6''-O-(3-Hydroxy-3-methylglutaroyl)astragalol                                          | C27 H28 O15     |
| HMDB37162 | 2.1039        | 1.0731  | 0.043979 | 1,2,3-Tris(1-ethoxyethoxy)propane                                                      | C15 H32 O6      |
| HMDB40744 | 3.4149        | 1.7718  | 0.044006 | Polypodoside B                                                                         | C39 H62 O13     |
| HMDB15057 | 0.33131       | -1.5937 | 0.044126 | Buprenorphine                                                                          | C29 H41 N O4    |
| HMDB32739 | 2.3503        | 1.2328  | 0.044302 | S-Methyl methanesulfinothioate                                                         | C2 H6 O S2      |
| HMDB15686 | 6.1234        | 2.6143  | 0.044646 | Pipazethate                                                                            | C21 H25 N3 O3 S |
| HMDB36593 | 2.4998        | 1.3218  | 0.045108 | Validamycin B                                                                          | C20 H35 N O14   |
| HMDB29044 | 2.1308        | 1.0914  | 0.045317 | Serinyln-Lysine                                                                        | C9 H19 N3 O4    |
| HMDB38779 | 2.1076        | 1.0756  | 0.04614  | 4'-Methylisoscuteallarein 8-(2''-sulfoglucoside)                                       | C22 H22 O14 S   |
| HMDB41048 | 0.21701       | -2.2041 | 0.046204 | Physagulin B                                                                           | C30 H39 Cl O7   |



|           |         |         |          |                                               |                     |
|-----------|---------|---------|----------|-----------------------------------------------|---------------------|
| HMDB39904 | 2.1485  | 1.1033  | 0.046444 | 3'-Methoxytricetin 7-glucuronide              | C22 H20 O13         |
| HMDB29795 | 0.43662 | -1.1956 | 0.046514 | Montecristin                                  | C37 H66 O4          |
| HMDB33133 | 2.1464  | 1.1019  | 0.046634 | 2-Acetylthiophene                             | C6 H6 O S           |
| HMDB36479 | 2.2053  | 1.141   | 0.046926 | Cyclolinopeptide F                            | C55 H73 N9 O10 S2   |
| HMDB10411 | 2.2279  | 1.1557  | 0.047101 | TG(16:0/14:0/16:0)[iso3]                      | C49 H94 O6          |
| HMDB11558 | 2.2524  | 1.1715  | 0.047233 | MG(0:0/24:0/0:0)                              | C27 H54 O4          |
| HMDB11898 | 2.272   | 1.184   | 0.047502 | Ganglioside GM2 (d18:0/18:1(11Z))             | C68 H122 N2 O26     |
| HMDB29948 | 2.3052  | 1.2049  | 0.047962 | Scleroglucan                                  | C24 H44 O20 P2      |
| HMDB11806 | 2.3117  | 1.209   | 0.048132 | Ganglioside GD1a (d18:1/26:1(17Z))            | C93 H163 N3 O39     |
| HMDB29243 | 2.484   | 1.3126  | 0.048257 | Cyanidin 3-O-(6''-malonyl-arabinoside)        | C23 H21 O13         |
| HMDB00244 | 0.40052 | -1.3201 | 0.048385 | Riboflavin                                    | C17 H20 N4 O6       |
| HMDB31778 | 3.0216  | 1.5953  | 0.048616 | Diflubenzuron                                 | C14 H9 Cl F2 N2 O2  |
| HMDB31041 | 4.5406  | 2.1829  | 0.049095 | (8E,15E)-1,8,15-Heptadecatriene-11,13-diyne   | C17 H22             |
| HMDB11810 | 2.3803  | 1.2512  | 0.04926  | Ganglioside GD1b (d18:0/18:0)                 | C85 H151 N3 O39     |
| HMDB06890 | 2.2797  | 1.1888  | 0.049362 | 3a,7a,12a,24-Tetrahydroxy-5b-cholestanoyl-CoA | C48 H80 N7 O21 P3 S |
| HMDB31083 | 0.32033 | -1.6424 | 0.049367 | (E)-7-Pentadecene                             | C15 H30             |
| HMDB15179 | 2.4497  | 1.2926  | 0.049976 | Rifampin                                      | C43 H58 N4 O12      |

---

## Supporting Figures

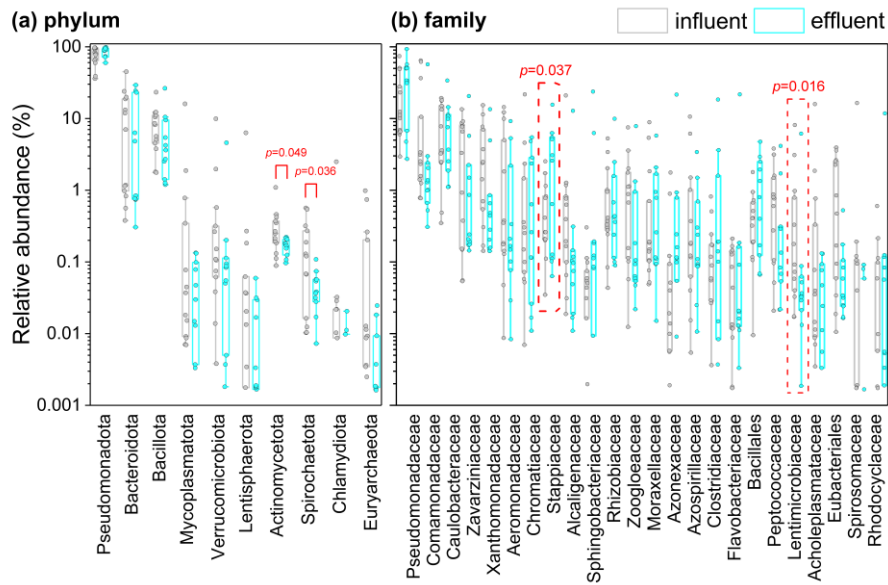

Figure S1 The dominant taxa at phylum (a) and family (b) levels.

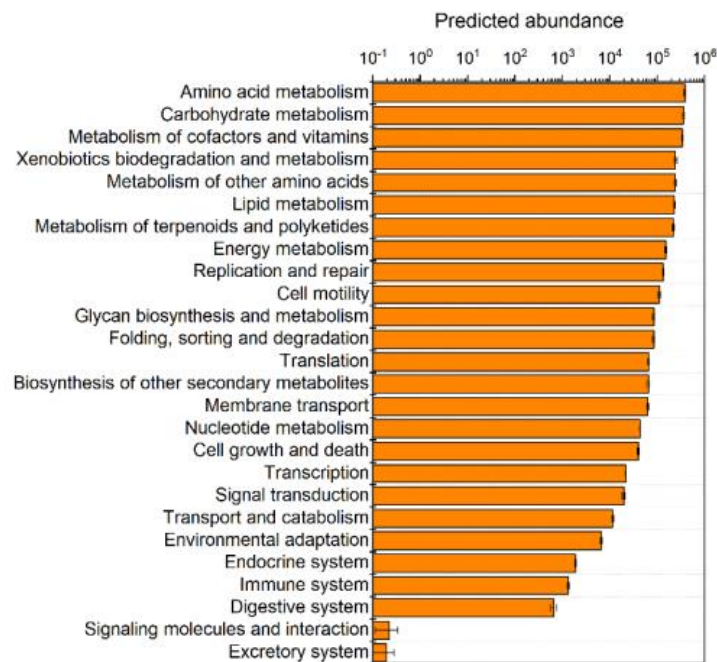

Figure S2 Predictive functional gene analysis of the underground water reservoir at level 2.

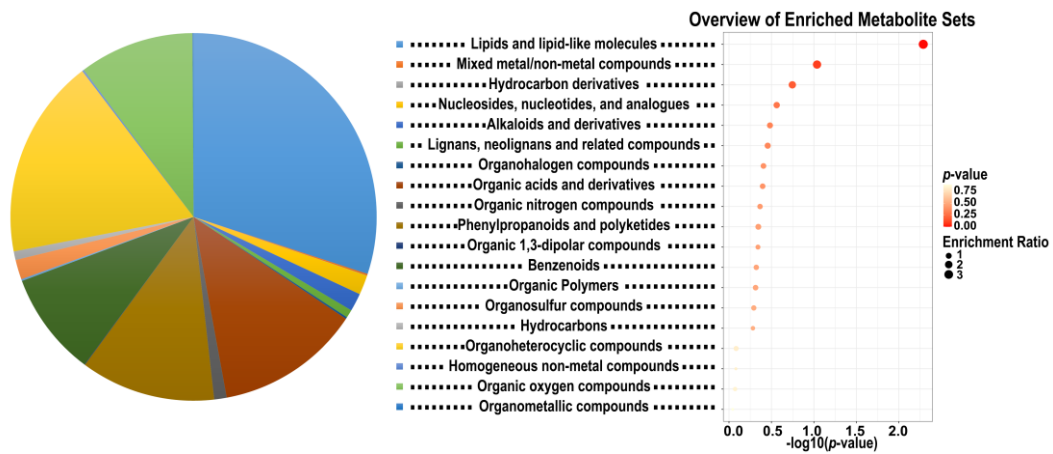

Figure S3 The component of metabolites in the water samples and the enriched components in the effluent water samples.

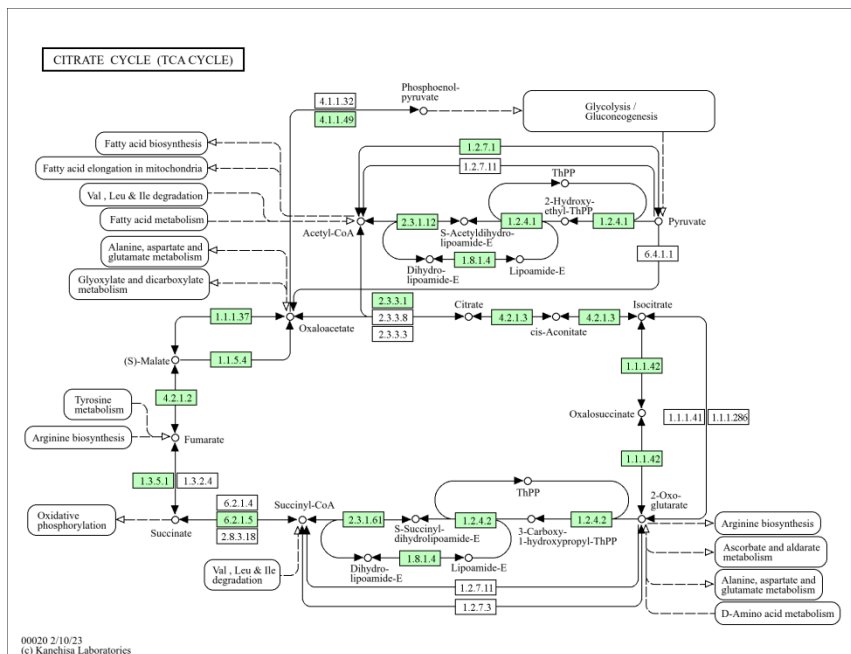

Figure S4 The Citrate cycle (TCA cycle) in the aquifer.

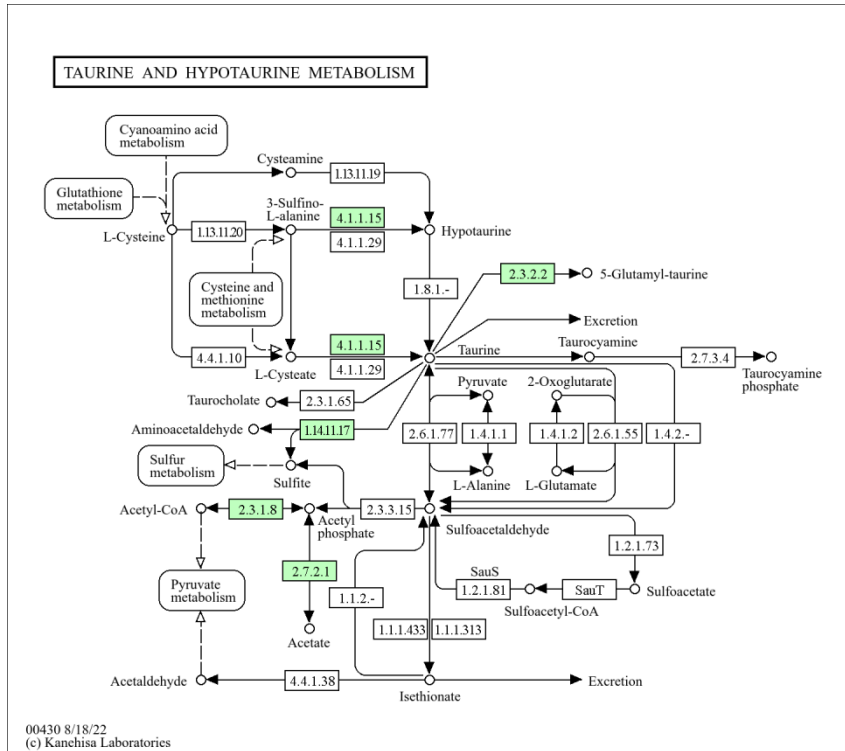

Figure S5 The Taurine and hypotaurine metabolism in the aquifer.

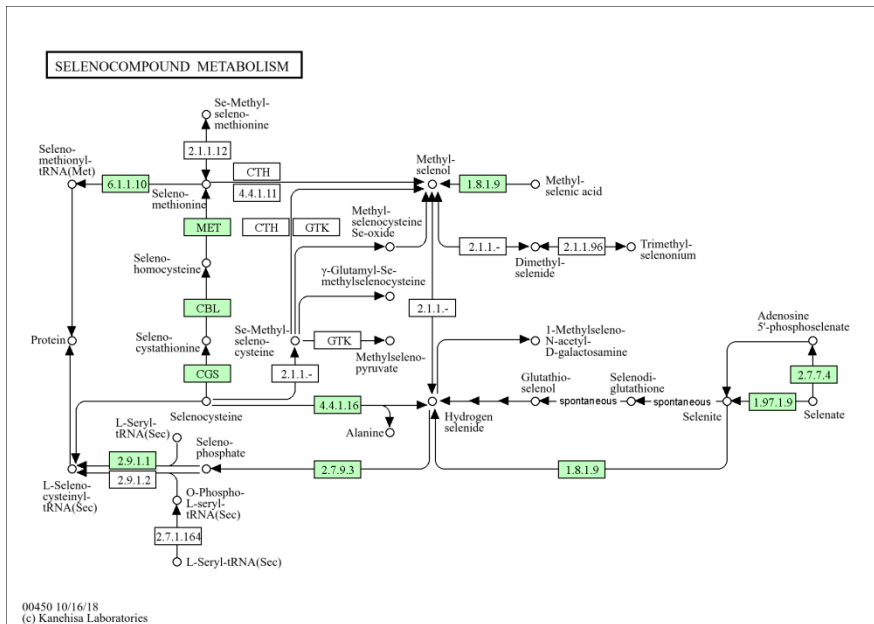

Figure S6 The Selenocompound metabolism in the aquifer.

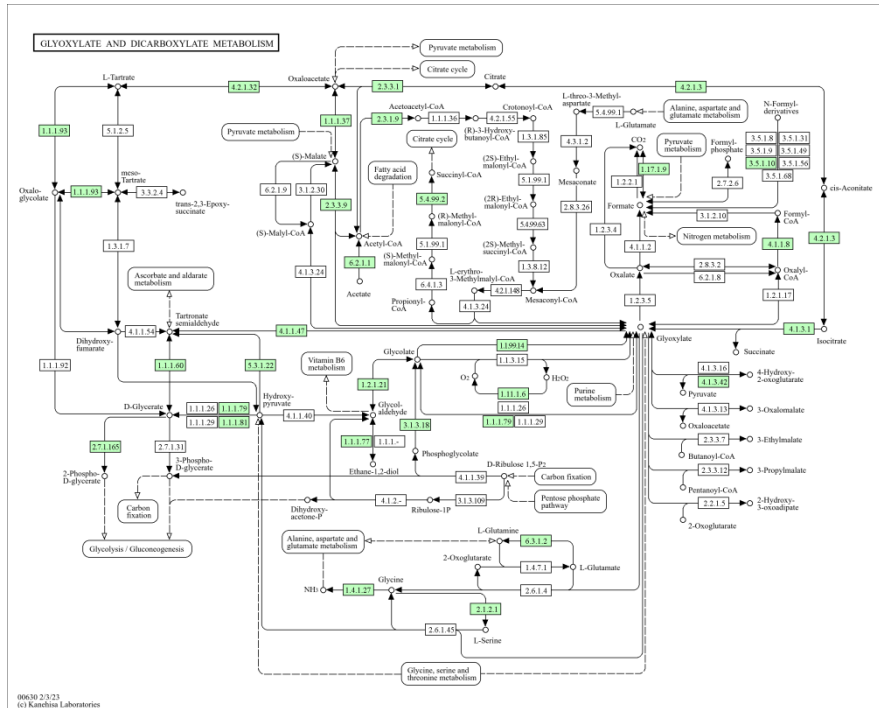

Figure S7 The Glyoxylate and dicarboxylate metabolism in the aquifer.

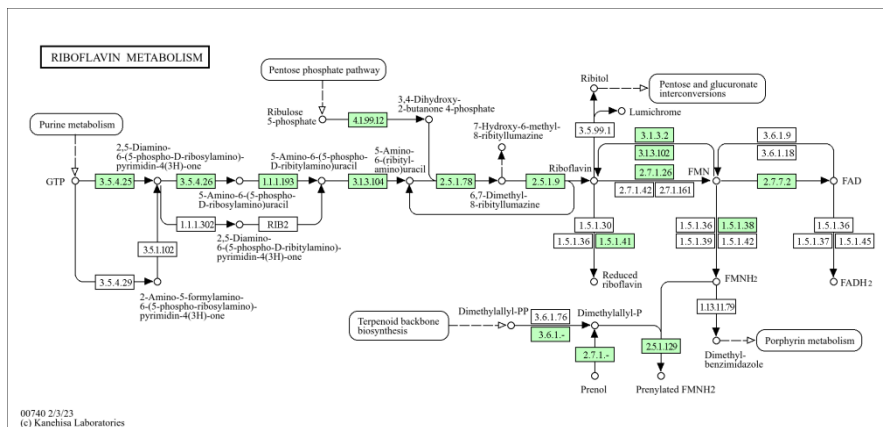

Figure S8 The Riboflavin metabolism in the aquifer.
